# Supplementary material for: A feedback loop between nonsense-mediated decay and the retrogene DUX4 in facioscapulohumeral muscular dystrophy
Source: eLife. 2015 Jan 7;4:e04996. doi: 10.7554/eLife.04996 (PMC4383350; doi:10.7554/eLife.04996)
Supplement: Supplementary file 1. — Primer sequences used for cloning and real-time PCR assays. List of primers used for cloning and real-time PCR. GENE ID, Ensembl ID for the tested genes. RPL27 and SRP14: housekeeping genes. HNRNPD, SRSF2, and SRSF3: inclusion primer sets measure levels of endogenously produced NMD-degraded isoforms. Endogenous DUX4 mRNA was measured with primers specific to its 3′ UTR (RKB_929 and RKB_930). Expression from chimeric Gl-DUX4-Intron2(+) and Gl-DUX4-Intron2(−) constructs was measured with primers specific to the spliced β-globin region. DOI: http://dx.doi.org/10.7554/eLife.04996.008 [file elife04996s001.xlsx]

## Sheet: Sheet1
ID	SPECIES	GENE NAME	GENE ID	STRAND	Tm	APP	NOTES	REFERENCE	SEQUENCE
RKB_39	human	RPL27	ENSG00000131469	F	60	real time	coding exon 2		GCAAGAAGAAGATCGCCAAG
RKB_40	human	RPL27	ENSG00000131469	R	60	real time	coding exon 3		TCCAAGGGGATATCCACAGA
RKB_41	human	SRP14	ENSG00000140319	F	60	real time	coding exon 1		GAGAGCGAGCAGTTCCTGAC
RKB_42	human	SRP14	ENSG00000140319	R	60	real time	coding exon 2-3 junction		GTTTGGTTCGACCGTCATACT
RKB_311	human	HNRNPD	ENSG00000138668	F	60	real time	F		GCAGAGTGGTTATGGGAAGG
RKB_312	human	HNRNPD	ENSG00000138668	R	60	real time	Inclusion R		ATGAAGTTCCCGCTGTTGG
RKB_313	human	HNRNPD	ENSG00000138668	R	60	real time	Exclusion R		CACCACCTGTTGGGGATAAG
RKB_314	human	SRSF2	ENSG00000161547	F	60	real time	Inclusion F		GTGTCCAAGAGGGAATCCAA
RKB_315	human	SRSF2	ENSG00000161547	R	60	real time	Inclusion R		AGGAGACCGCAGCATTTTCT
RKB_316	human	SRSF2	ENSG00000161547	F	60	real time	Exclusion F		GTGTCCAAGAGGGAATCCAA
RKB_317	human	SRSF2	ENSG00000161547	R	60	real time	Exclusion R		TGCTTGCCGATACATCATTT
RKB_320	human	SRSF3	ENSG00000112081	F	60	real time	F		TGGAACTGTCGAATGGTGAA
RKB_321	human	SRSF3	ENSG00000112081	R	60	real time	Inclusion R		GGGTGGTGAGAAGAGACATGA
RKB_322	human	SRSF3	ENSG00000112081	R	60	real time	Exclusion R		CTTGGAGATCTGCGACGAG
RKB_929	human	DUX4	ENSG00000260596	F	60	real time	exon2		GGCCCGGTGAGAGACTCCACAC
RKB_930	human	DUX4	ENSG00000260596	R	60	real time	exon3		CCAGGAGATGTAACTCTAATCCAGGTTTGC
RKB_715	mouse	MUP	ENSMUSG00000078683	F	60	real time	exon 5/6		GACCTATCCAATGCCAATCG
RKB_716	mouse	MUP	ENSMUSG00000078683	R	60	real time	inside exon 7		GATGATGGTGGAGTCCTGGT
RKB_735	mouse	Hbb	ENSMUSG00000052305	F	60	real time		L.B. Gardner (2008)	TTGAGTCCTTTGGGGATCTG
RKB_736	mouse	Hbb	ENSMUSG00000052305	R	60	real time		L.B. Gardner (2008)	CTTTCTTGCCATGAGCCTTC
RKB_960	human	HBB	ENSG00000244734	F	60	real time	inside exon2		GCTCGGTGCCTTTAGTGATG
RKB_961	mouse	Hbb	ENSMUSG00000052305	R	60	real time	inside exon3, mouse specific		CCCAGCACAATCACGATCATA
RKB_917	mouse	Hbb	ENSMUSG00000052305	F	60	cloning	cloning Gl backbone, downstream of 3'utr		TGTGTCATAGAAGGGTTTATGCT
RKB_918	mouse	Hbb	ENSMUSG00000052305	R	60	cloning	right upstream of Gl 3'utr		CTAGTGGTACTTGTGAGCCAGG
RKB_919	human	DUX4	ENSG00000260596	F	75	cloning	insert DUX4 3'utr		CCTGGCTCACAAGTACCACTAGGACGCGGGGTTGGGA
RKB_920	human	DUX4	ENSG00000260596	R	75	cloning	insert DUX4 3'utr		AGCATAAACCCTTCTATGACACAGGAGTTCTGAAACACATCTGCACTG
