# Supplementary figures and images for: A feedback loop between nonsense-mediated decay and the retrogene DUX4 in facioscapulohumeral muscular dystrophy
Source: eLife journal article supplement (doi:10.7554/elife.04996), 2015-01-07

**Figure S1****A**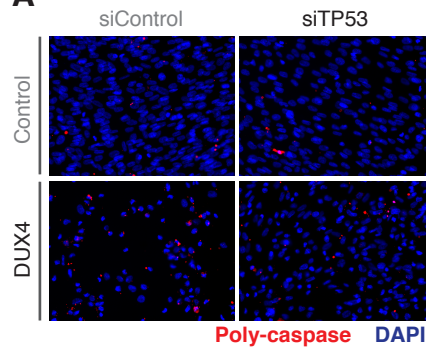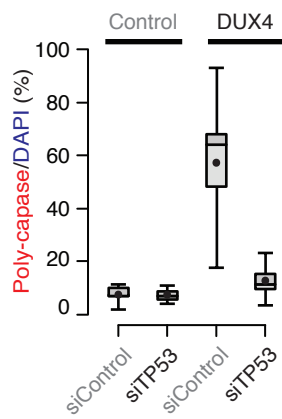**B**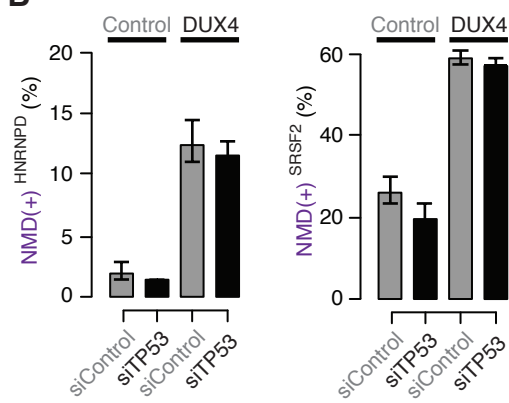

Supplement: supp [file elife-04996-supp-v1.zip]
